# Supplementary material for: Intravenous nicardipine for Japanese patients with acute intracerebral hemorrhage: an individual participant data analysis
Source: Springer Nature journal article supplement (doi:10.1038/s41440-022-01046-4), 2022-10-12
Supplement: MOESM1 [file 41440_2022_1046_MOESM1_ESM.pdf]

**Supplementary Table 1. Design and main methods of the individual studies**

|                                       | ATACH-2                                                                                                                                                                                                                                                                                                                                     | SAMURAI-ICH                                                                                |
|---------------------------------------|---------------------------------------------------------------------------------------------------------------------------------------------------------------------------------------------------------------------------------------------------------------------------------------------------------------------------------------------|--------------------------------------------------------------------------------------------|
| Design                                | Randomized, two-group, open-label                                                                                                                                                                                                                                                                                                           | One-arm, prospective                                                                       |
| Registration period                   | May 2011 – September 2015                                                                                                                                                                                                                                                                                                                   | July 2009 – June 2011                                                                      |
| Number of registered patients         | 1,000                                                                                                                                                                                                                                                                                                                                       | 211                                                                                        |
| Target disease                        | Intracerebral hemorrhage, spontaneous, supratentorial, hematoma volume <60 mL                                                                                                                                                                                                                                                               |                                                                                            |
| Age / sex                             | ≥18 y, <90 y, either sex                                                                                                                                                                                                                                                                                                                    | ≥20 y, either sex                                                                          |
| Initial systolic blood pressure (SBP) | >180 mmHg                                                                                                                                                                                                                                                                                                                                   |                                                                                            |
| Initial Glasgow Coma Scale            | ≥5                                                                                                                                                                                                                                                                                                                                          |                                                                                            |
| Inclusion of patients taking warfarin | Eligible unless taking within the last 5 d                                                                                                                                                                                                                                                                                                  | Eligible if INR is <1.7                                                                    |
| Treatment                             | Continuous intravenous nicardipine for 24 h                                                                                                                                                                                                                                                                                                 |                                                                                            |
| Max time from onset to nicardipine    | 4.5 h (initially 3 h)                                                                                                                                                                                                                                                                                                                       | 3 h                                                                                        |
| Target range of SBP                   | [1] 140 – 179 mmHg versus [2] 110 – 139 mmHg (1:1)                                                                                                                                                                                                                                                                                          | 120 – 160 mmHg                                                                             |
| Titration of nicardipine              | Nicardipine was administered as a continuous infusion with a starting dose of 5 mg/h, and then increased by 2.5 mg/h every 15 min as needed, up to a maximum of 15 mg/h. If SBP fell below the lower limit of target range, nicardipine was reduced in a stepwise pattern until SBP returns to target range or nicardipine is discontinued. |                                                                                            |
| Frequency of SBP measurement          | Every 5 min during the first 15 mins, then every 15 min for the first hour, and every 15 to 30 min during the remainder of the first 24 h                                                                                                                                                                                                   | Every 15 min during the first 2 h, and every 60 min during the remainder of the first 24 h |
| Timing of brain CT examination        | Baseline and 24 h later                                                                                                                                                                                                                                                                                                                     |                                                                                            |
| Follow-up mRS                         | 90 d (3 months)                                                                                                                                                                                                                                                                                                                             |                                                                                            |

Supplementary Figure 1. The trend of hourly systolic blood pressure during the initial 24 h

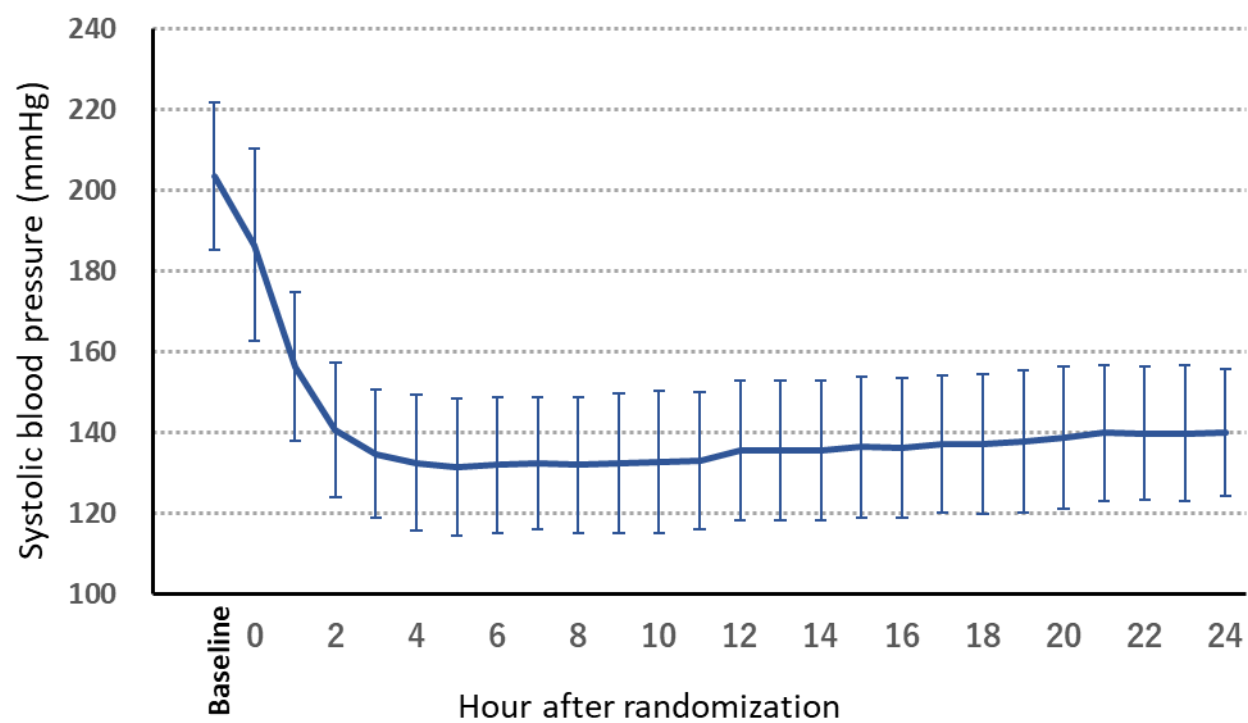

Mean values and 95% confidence intervals.
